# Supplementary material
Source: PubMed Central journal article supplement (PMC4317735)
Supplement: CJN.03330414_CJN03330414SupplementaryData.pdf [file CJN.03330414_CJN03330414SupplementaryData.pdf]

547 Supplementary Table: characteristics of responders and non-responders to MSAS and QOL  
548 surveys.

| Variable             | Value label            | returned MSAS | Not returned MSAS | total       | p-value |
|----------------------|------------------------|---------------|-------------------|-------------|---------|
| Sex                  |                        |               |                   |             | 0.2499  |
|                      | Male                   | 136 (65.7%)   | 121 (60.2%)       | 257 (63.0%) |         |
|                      | Female                 | 71 (34.3%)    | 80 (39.8%)        | 151 (37.0%) |         |
|                      | total                  | (n= 207)      | (n= 201)          | (n= 408)    |         |
| Any diabetic         |                        |               |                   |             | 0.6142  |
|                      | No                     | 103 (49.8%)   | 95 (47.3%)        | 198 (48.5%) |         |
|                      | Yes                    | 104 (50.2%)   | 106 (52.7%)       | 210 (51.5%) |         |
|                      | total                  | (n= 207)      | (n= 201)          | (n= 408)    |         |
| Any dementia         |                        |               |                   |             | 0.7481  |
|                      | No                     | 200 (96.6%)   | 193 (96.0%)       | 393 (96.3%) |         |
|                      | Yes                    | 7 ( 3.4%)     | 8 ( 4.0%)         | 15 ( 3.7%)  |         |
|                      | total                  | (n= 207)      | (n= 201)          | (n= 408)    |         |
| Co-morbidities group |                        |               |                   |             | 0.5694  |
|                      | no comorb or 1 comorb  | 116 (56.0%)   | 107 (53.2%)       | 223 (54.7%) |         |
|                      | 2 or more comorb       | 91 (44.0%)    | 94 (46.8%)        | 185 (45.3%) |         |
|                      | total                  | (n= 207)      | (n= 201)          | (n= 408)    |         |
| Smoke groups         |                        |               |                   |             | 0.7461  |
|                      | non                    | 135 (65.2%)   | 124 (61.7%)       | 259 (63.5%) |         |
|                      | current                | 14 ( 6.8%)    | 14 ( 7.0%)        | 28 ( 6.9%)  |         |
|                      | former                 | 58 (28.0%)    | 63 (31.3%)        | 121 (29.7%) |         |
|                      | total                  | (n= 207)      | (n= 201)          | (n= 408)    |         |
| Nutritional status   |                        |               |                   |             | 0.8939  |
|                      | A                      | 69 (59.5%)    | 52 (57.8%)        | 121 (58.7%) |         |
|                      | B                      | 45 (38.8%)    | 37 (41.1%)        | 82 (39.8%)  |         |
|                      | C                      | 2 ( 1.7%)     | 1 ( 1.1%)         | 3 ( 1.5%)   |         |
|                      | total                  | (n= 116)      | (n= 90)           | (n= 206)    |         |
| Ethnicity            |                        |               |                   |             | 0.0597  |
|                      | caucasian              | 177 (85.5%)   | 149 (74.1%)       | 326 (79.9%) |         |
|                      | asian                  | 15 ( 7.2%)    | 28 (13.9%)        | 43 (10.5%)  |         |
|                      | ABTSI                  | 0 ( 0.0%)     | 1 ( 0.5%)         | 1 ( 0.2%)   |         |
|                      | pacific                | 5 ( 2.4%)     | 9 ( 4.5%)         | 14 ( 3.4%)  |         |
|                      | arabic                 | 10 ( 4.8%)    | 14 ( 7.0%)        | 24 ( 5.9%)  |         |
|                      | total                  | (n= 207)      | (n= 201)          | (n= 408)    |         |
| Renal diagnoses      |                        |               |                   |             | 0.6121  |
|                      | renal vascular disease | 74 (35.7%)    | 78 (38.8%)        | 152 (37.3%) |         |
|                      | DM                     | 62 (30.0%)    | 68 (33.8%)        | 130 (31.9%) |         |
|                      | PKD                    | 8 ( 3.9%)     | 10 ( 5.0%)        | 18 ( 4.4%)  |         |
|                      | GN                     | 35 (16.9%)    | 25 (12.4%)        | 60 (14.7%)  |         |
|                      | unknown                | 1 ( 0.5%)     | 1 ( 0.5%)         | 2 ( 0.5%)   |         |
